# Supplementary material for: Composite hydrogels with antioxidant and robust adhesive properties for the prevention of radiation-induced dermatitis
Source: Royal Society of Chemistry journal article supplement (doi:10.1039/d4tb00511b), 2024-01-01
Supplement: d4tb00511b1.pdf [file d4tb00511b1.pdf]

## Supplementary data

### **Composite hydrogels with antioxidant and robust adhesive properties for the prevention of radiation-induced dermatitis**

Xue Luo,<sup>1</sup> Huan Liu,<sup>1</sup> Jing Wen,<sup>1</sup> Jiabin Hu,<sup>1</sup> Yongzhi Li,<sup>1</sup> Guangjun Li,<sup>2</sup> Guyu Dai,<sup>2</sup> Yubao Li\* and Jidong Li\*

*1 Research Center for Nano-Biomaterials, Analytical and Testing Center, Sichuan University, Chengdu, 610065, PR China*

*2 Department of Radiotherapy Physics & Technology, West China Hospital, Sichuan University, Chengdu, 610041, PR China*

---

*Research Center for Nano-Biomaterials, Analytical and Testing Center, Sichuan University, Chengdu, 610064, PR China.*

*E-mail: [nic7504@scu.edu.cn](mailto:nic7504@scu.edu.cn), [nic1979@scu.edu.cn](mailto:nic1979@scu.edu.cn)*

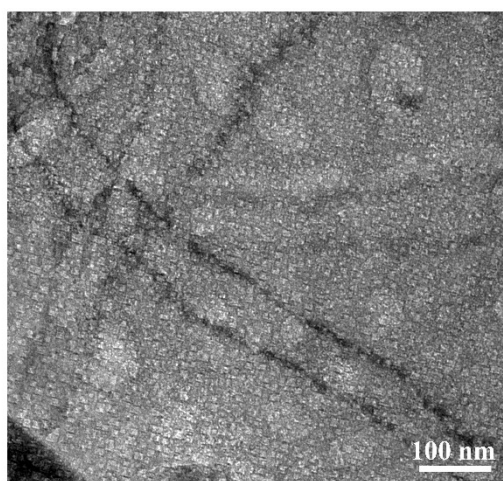

**Fig. S1** TEM image of SA precursor solutions.

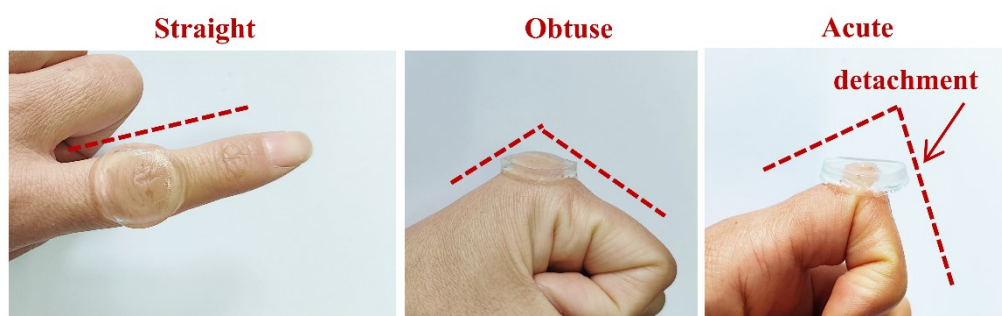

**Fig. S2** Photos of SP hydrogel adhesion on human finger bending at different angles.

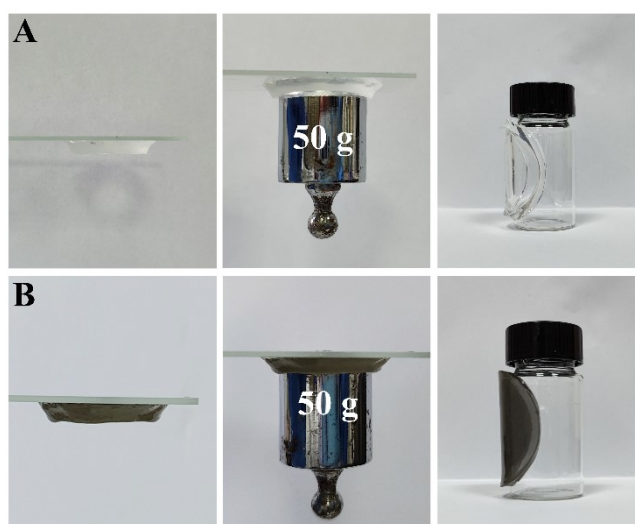

**Fig. S3** Photos of hydrogels adhesion on glass substrate.

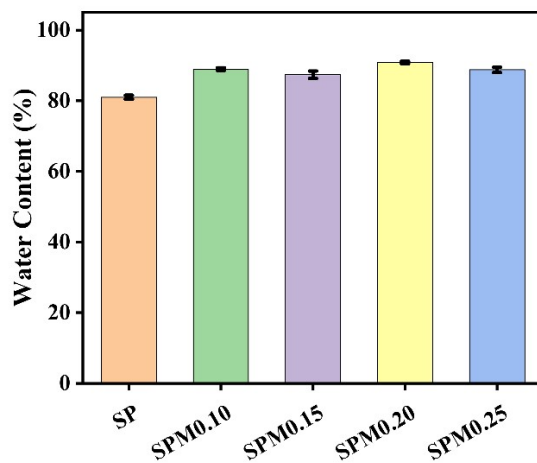

Fig. S4 Water content of hydrogels.

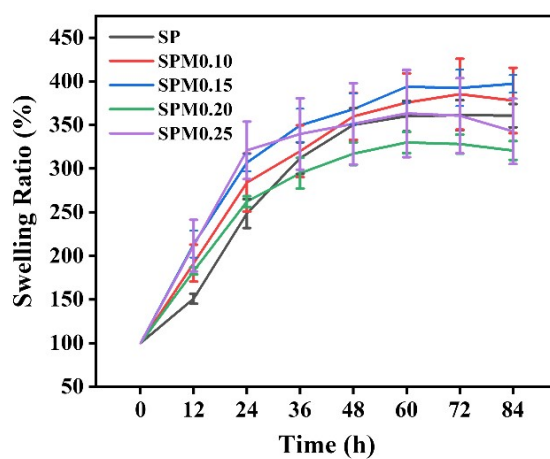

Fig. S5 Swelling rate of hydrogels in water.

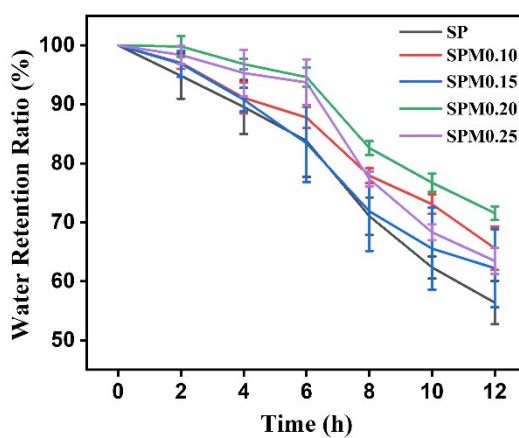

Fig. S6 Water Retention of hydrogels at 37°C.

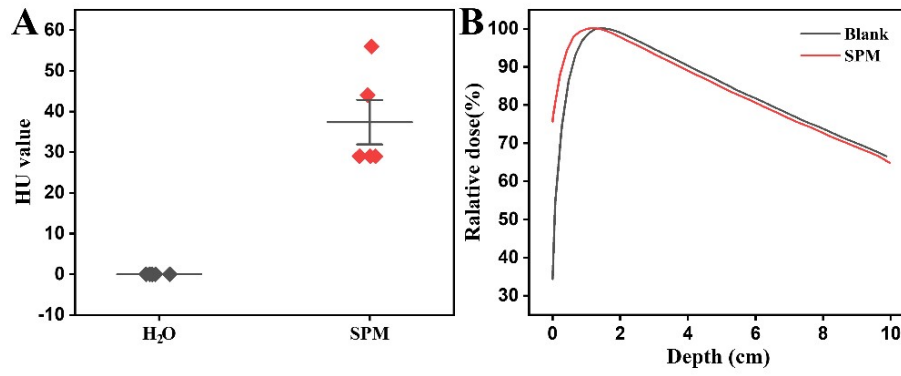

**Fig. S7** HU value (A) and PDD curve (B) of SPM hydrogel.

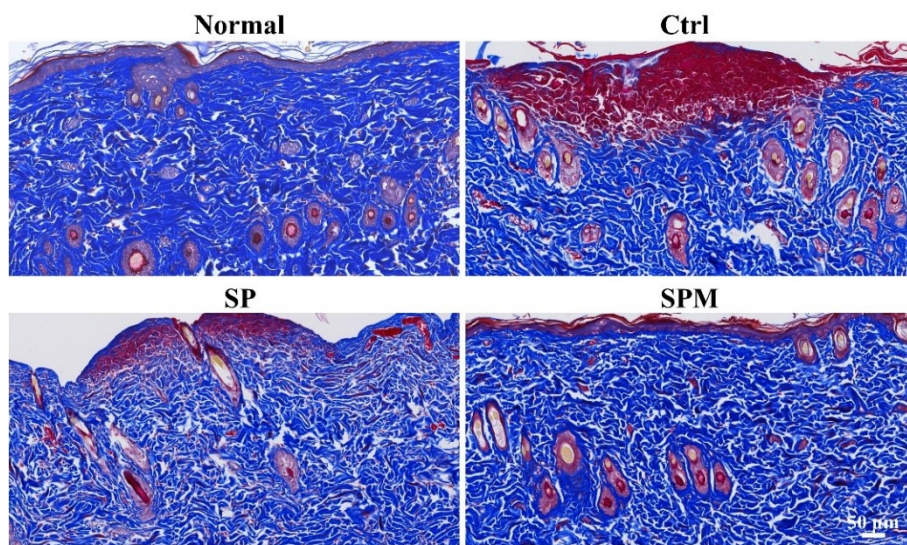

**Fig. S8** Masson staining of rat skin tissue after 7 days with different treatments.
